# Supplementary material for: Hair follicle renewal: authentic morphogenesis that depends on a complex progression of stem cell lineages
Source: Oxford University Press journal article supplement (doi:10.1242/dev.044123), 2010-01-28
Supplement: dev044123tables2.pdf [file dev044123tables2.pdf]

**Table S2. Statistical analysis of the clonality of labeling**

|                               |     |                      | d                            | e                            | f                            | g                            | h                            | i                            | j                            | k                            | l                            | m                            | n      |
|-------------------------------|-----|----------------------|------------------------------|------------------------------|------------------------------|------------------------------|------------------------------|------------------------------|------------------------------|------------------------------|------------------------------|------------------------------|--------|
| Animal                        |     |                      | CMV#2                        | CMV#5                        | Rosa#1                       | CMV#1                        | CMV#4                        | Rosa#1                       | CMV#3                        | CMV#3                        | CMV#4                        | Rosa#1                       | CMV#1  |
| Date of induction/biopsy      |     |                      | D-2/D14                      | P18/P33                      | D-2/D14                      | D8/D14+1c<br>ycle            | D3/D14+1c<br>ycle            | D3/D14+1c<br>ycle            | D3/D14+2c<br>ycles           | D3/D14                       | D3/D14                       | D3/D14                       | D8/D14 |
| Adjusted total number of HF's |     |                      | 354                          | 307                          | 1741                         | 601                          | 357                          | 1221                         | 1070                         | 673                          | 353                          | 554                          | 492    |
| Multipotent                   | OIC | Observed<br>(Fisher) | 26<br>( $P=1\times10^{-8}$ ) | 22<br>( $P=3\times10^{-7}$ ) | 20<br>( $P=1\times10^{-6}$ ) | 22<br>( $P=2\times10^{-7}$ ) | 21<br>( $P=4\times10^{-7}$ ) | 17<br>( $P=7\times10^{-6}$ ) | 17<br>( $P=7\times10^{-6}$ ) | 11<br>( $P=5\times10^{-4}$ ) | 16<br>( $P=1\times10^{-5}$ ) | 5                            | 4      |
|                               |     | Expected             | 0.2                          | 0.3                          | 0.1                          | 0                            | 0.1                          | 0                            | 0                            | 0.2                          | 0.3                          | 2.7                          | 4.7    |
|                               | OI  | Observed             | 0                            | 0                            | 2                            | 0                            | 0                            | 2                            | 1                            | 3                            | 1                            | 3                            | 3      |
|                               |     | Expected             | 0                            | 0                            | 0                            | 0                            | 0                            | 0                            | 0                            | 0                            | 0                            | 0.3                          | 0.9    |
|                               | OC  | Observed             | 0                            | 1                            | 0                            | 2                            | 2                            | 0                            | 0                            | 1                            | 1                            | 0                            | 1      |
|                               |     | Expected             | 0                            | 0                            | 0.4                          | 0                            | 0                            | 0                            | 0                            | 0.2                          | 0.1                          | 0                            | 0.5    |
| Oligopotential<br>internal    | IC  | Observed<br>(Fisher) | 3                            | 7 ( $P=0.01$ )               | 6 ( $P=0.02$ )               | 2                            | 4                            | 3                            | 5 ( $P=0.03$ )               | 6 ( $P=0.02$ )               | 10<br>( $P=1\times10^{-4}$ ) | 11<br>( $P=5\times10^{-4}$ ) | 2      |
|                               |     | Expected             | 0                            | 0                            | 0                            | 0                            | 0                            | 0                            | 0                            | 0                            | 0                            | 0.1                          | 0.1    |

d-n, first line, designates the experiment. For the calculations, the total number of HF's has been adjusted to correspond to the number of analyzed HF's (adjusted total number of HF's=analyzed HF's  $\times$  total HF's / total labeled HF's). The expected number of labeled HF's that comprise two labeled structures due to the combination of two labeling events in the two different structures equals the product of the frequency of single events. The expected number of labeled HF's that comprise three labeled structures (the OIC category) due to the combination of three labeling events of the three different structures or of two labeling events (of OI, OC and IC and, respectively, C, I and O) equals the product of the frequency of single events. Fisher's exact tests were used to compare the observed numbers of HF's with the expected numbers of HF's resulting from double or triple events of recombination. The *P* values by which the clonality of labeling is validated (bold) are reported in brackets.
